# Supplementary material for: Intrinsic interlayer electric field induced switched regulatory mechanisms of photovoltaics and photocatalysis in Z-scheme In2Se3/Sb heterobilayers
Source: Royal Society of Chemistry journal article supplement (doi:10.1039/d5ta00818b), 2025-01-01
Supplement: d5ta00818b1.pdf [file d5ta00818b1.pdf]

**Supplemental Information for:**

**Intrinsic Intertlayer Electric Field Induced Switched Regulatory  
Mechanisms of Photovoltaics and Photocatalysis in Z-scheme  
Heterobilayers**

Qiang Wang,<sup>a</sup> Keying Han,<sup>\*,a</sup> Yan Liang,<sup>b</sup> Xingshuai Lv,<sup>c</sup> Thomas Frauenheim,<sup>d</sup>  
Xiangrong Meng,<sup>a</sup> Sheng Wang,<sup>a</sup> Defeng Guo,<sup>\*,a</sup> and Bin Wang<sup>\*,e</sup>

<sup>a</sup> State Key Laboratory of Metastable Materials Science and Technology and Key Laboratory for Microstructural Material Physics of Hebei Province, School of Science, Yanshan University, Qinhuangdao 066004, People's Republic of China. E-mail: hanky@stumail.ysu.edu.cn; guodf@ysu.edu.cn

<sup>b</sup> College of Physics and Optoelectronic Engineering, Faculty of Information Science and Engineering, Ocean University of China, Songling Road 238, Qingdao 266100, People's Republic of China.

<sup>c</sup> College of Chemistry and Chemical Engineering, Ocean University of China, Songling Road 238, Qingdao 266100, People's Republic of China.

<sup>d</sup> School of Science, Constructor University, 28759 Bremen, Germany; Computational Science and Applied Research Institute (CSAR), Shenzhen 518110, P. R. China; Beijing Computational Science Research Center (CSRC), Beijing 100193, P. R. China.

<sup>e</sup> Shenzhen Key Laboratory of Advanced Thin Films and Applications, College of Physics and Optoelectronic Engineering, Shenzhen University, Shenzhen, 518060, People's Republic of China. E-mail: binwang@szu.edu.cn

Corresponding Authors:

\*E-mail: [hanky@stumail.ysu.edu.cn](mailto:hanky@stumail.ysu.edu.cn); [guodf@ysu.edu.cn](mailto:guodf@ysu.edu.cn)

[binwang@szu.edu.cn](mailto:binwang@szu.edu.cn)

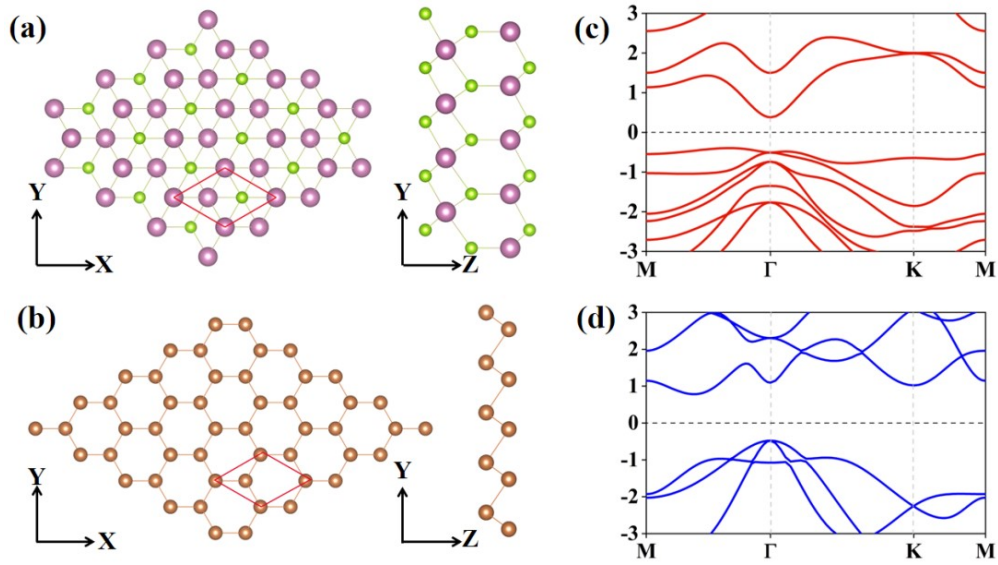

**Fig. S1.** (a-b) Top and side views of schematic structures for In<sub>2</sub>Se<sub>3</sub> and Sb monolayer, respectively. (c-d) Band structures of In<sub>2</sub>Se<sub>3</sub> and Sb monolayer based on PBE level, in each panel, the Fermi levels are marked with horizontal black dashed lines.

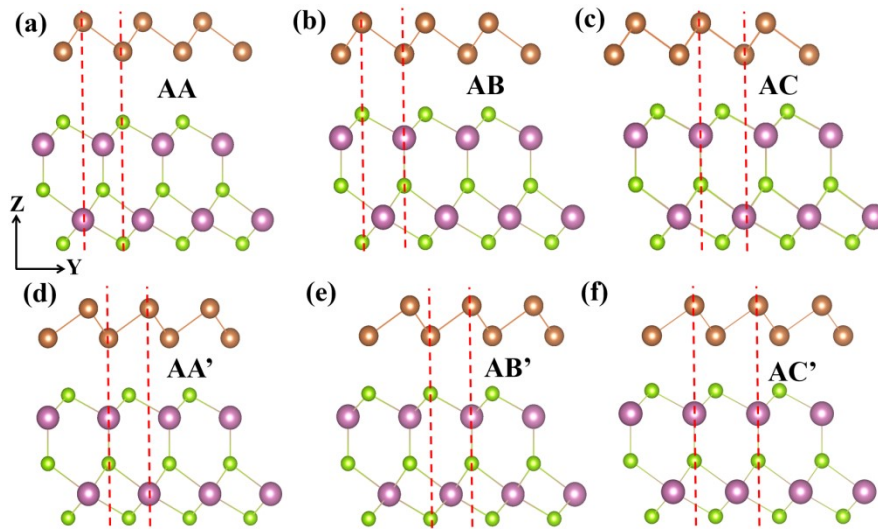

**Fig. S2 .** (a-f) Side view of different stacking modes for In<sub>2</sub>Se<sub>3</sub>/Sb vdWH, with the alignment of atoms being marked by red dotted lines.

**TABLE SI.** Total energies ( $E_{\text{tot}}$ ) of  $\text{In}_2\text{Se}_3/\text{Sb}$  vdWH under different stacking modes.

| Stacking                    | AA       | AB       | AC       | AA'      | AB'      | AC'       |
|-----------------------------|----------|----------|----------|----------|----------|-----------|
| $E_{\text{tot}}(\text{eV})$ | -27.3817 | -27.4833 | -27.4916 | -27.4817 | -27.3824 | --27.3818 |

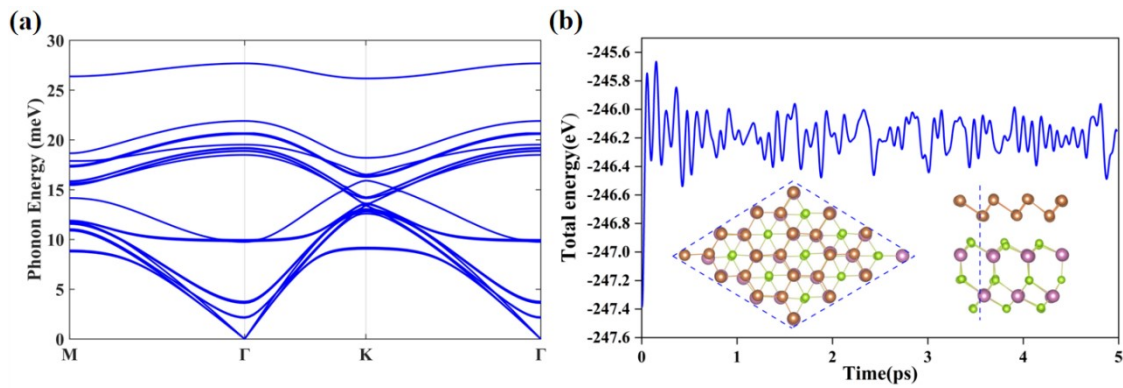

**Fig. S3 .** (a) Phonon band dispersion curves of  $\text{In}_2\text{Se}_3/\text{Sb}$  vdWH. (b) The variation in total energy of the  $3 \times 3$   $\text{In}_2\text{Se}_3/\text{Sb}$  vdWH supercell as a function of time under 300 K. Insets: top and side views of snapshot for the vdWH after evolution of 5 ps.

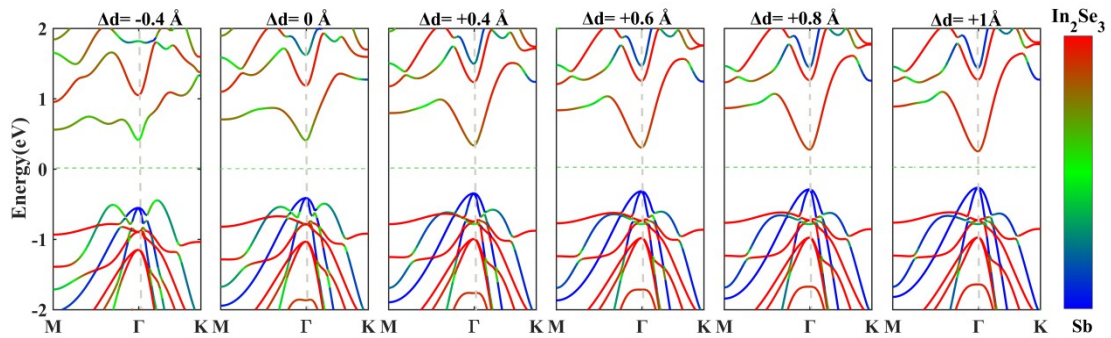

**Fig. S4 .** Band structures of  $\text{In}_2\text{Se}_3/\text{Sb}$  vdWH under various interlayer distances  $d$  at PBE level. In each panel, the energy bands projected on  $\text{In}_2\text{Se}_3$  and Sb components are colored in red and blue, respectively; The Fermi levels are marked with horizontal green

dashed lines; and the negative/positive sign indicates corresponding decrease/increase of d.

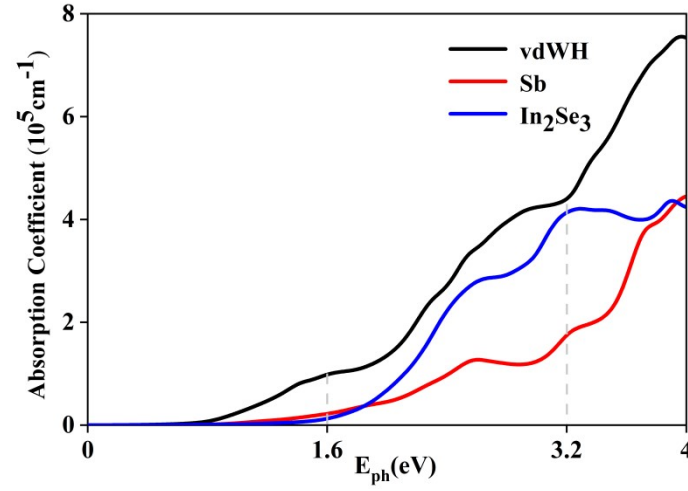

**Fig. S5** . Optical absorption coefficients versus incident light energy for monolayer  $\text{In}_2\text{Se}_3$ , Sb and  $\text{In}_2\text{Se}_3/\text{Sb}$  vdWH at PBE level.

### Solar-to-hydrogen (STH) efficiency for Z-scheme vdWH

Regarding the calculation method of solar-to-hydrogen (STH) efficiency is defined as follows:

$$\eta_{STH} = \eta_{abs} \times \eta_{cu} \quad (1)$$

where  $\eta_{abs}$  and  $\eta_{cu}$  are the efficiency of light absorption and carrier utilization, respectively, in which  $\eta_{abs}$  is estimated by:

$$\eta_{abs} = \frac{\int_{E_g}^{\infty} P(\hbar\omega) d(\hbar\omega)}{\int_0^{\infty} P(\hbar\omega) d(\hbar\omega)} \quad (2)$$

where  $P(\hbar\omega)$  is the solar flux at AM1.5 photon energy  $\hbar\omega$  and  $E_g$  is the band gap of the material.

According to Ref.[1,2,3], only half of the photo-generated carriers can be converted to hydrogen energy in Z-scheme photocatalytic water splitting. The  $\eta_{cu}$  is defined as:

$$\eta_{cu} = 0.5 \times \frac{\Delta G \int_E^{\infty} \frac{P(\hbar\omega)}{\hbar\omega} d(\hbar\omega)}{\int_{E_g}^{\infty} P(\hbar\omega) d(\hbar\omega)} \quad (3)$$

where  $\Delta G$  is the potential difference 1.23 eV for water splitting, and  $E$  is the actual photon energy used for water splitting. For a direct Z-scheme vdWH consisting of A and B systems, to achieve the Z-scheme mechanism for water redox reactions, the driving force from photo-generated electrons and holes must enable both the hydrogen evolution reaction (HER) in system A and the oxygen evolution reaction (OER) in system B.  $E$  can be estimated by:

$$E = \begin{cases} \max(E_{gA}, E_{gB}), & (\chi_{A(H_2)} \geq 0.2, \chi_{B(O_2)} \geq 0.6) \\ \max(E_{gA} + 0.2 - \chi_{A(H_2)}, E_{gB}), & (\chi_{A(H_2)} < 0.2, \chi_{B(O_2)} \geq 0.6) \\ \max(E_{gA}, E_{gB} + 0.6 - \chi_{B(O_2)}), & (\chi_{A(H_2)} \geq 0.2, \chi_{B(O_2)} < 0.6) \\ \max(E_{gA} + 0.2 - \chi_{A(H_2)}, E_{gB} + 0.6 - \chi_{B(O_2)}), & (\chi_{A(H_2)} < 0.2, \chi_{B(O_2)} < 0.6) \end{cases} \quad (4)$$

where  $\chi_{A(H_2)}$  and  $\chi_{B(O_2)}$  represent the overpotentials for HER in system A and OER in system B, respectively. Considering the energy loss during carrier migration between different materials, the required over potentials for HER and OER are assumed to be 0.2 eV and 0.6 eV, respectively.

In addition, the intrinsic interlayer built-in electric field does positive work for the electron-hole separation during the process of photocatalytic water splitting. Therefore, this part of work should be added into the total energy, and then the corrected STH efficiency of photocatalytic water splitting for 2D material with intrinsic  $E_{int}$  is calculated as:

$$\eta'_{STH} = \eta_{STH} \times \frac{\int_0^{\infty} P(\hbar\omega) d(\hbar\omega)}{\int_0^{\infty} P(\hbar\omega) d(\hbar\omega) + \Delta\Phi \int_E^{\infty} \frac{P(\hbar\omega)}{\hbar\omega} d(\hbar\omega)} \quad (5)$$

where  $\Delta\Phi$  is the vacuum level difference on the two single component layers of this 2D In<sub>2</sub>Se<sub>3</sub>/Sb vdWH.

### Reference

1. Y.Fan, J.Wang, M.Zhao, *Nanoscale*, 2019, 11, 14836-14843.
2. G.Wang, J.Chang, W.Tang, W.Xie, Y.Ang, *J Phys D Appl Phys*, 2022, 55, 293002.
3. C.Fu, X.Li, J.Yang, *Chem. Sci.*, 2021, 12, 2863-2869.
